# Supplementary material for: Controlling supramolecular structures in iron tetrasulfonated phthalocyanine films through pH variation: implications for thin-film device performance
Source: Royal Society of Chemistry journal article supplement (doi:10.1039/d3cp02500d), 2023-01-01
Supplement: d3cp02500d1.pdf [file d3cp02500d1.pdf]

## Controlling Supramolecular Structures in Iron Tetrasulfonated Phthalocyanine Films through pH Variation: Implications for Thin-Film Device Performance

Henry S. Kavazoi†<sup>1\*</sup>, Cibely S. Martin†<sup>1</sup>, Mateus D. Maximino<sup>1</sup>, Matheus S. Pereira<sup>1</sup>,  
Maria L. Rodriguez-Mendez<sup>2</sup>, Priscila Alessio<sup>1\*</sup>

<sup>1</sup> São Paulo State University (UNESP), School of Technology and Sciences, Presidente Prudente-SP, 19060-080, Brazil.

<sup>2</sup> Grupo UVAsens. Escuela de Ingenierías Industriales, Universidad de Valladolid, 47011, Valladolid, Spain.

\*corresponding author: [henry.seitiro@unesp.br](mailto:henry.seitiro@unesp.br) and [priscila.alessio@unesp.br](mailto:priscila.alessio@unesp.br)

†equal contribution

### Raman band assignments

**Table S1.** Raman band assignments for FeTsPc powder and PAH/FeTsPc LbL films.

| Powder (cm <sup>-1</sup> ) | PAH/FeTsPc film |        |        | Assignments                                                                   |
|----------------------------|-----------------|--------|--------|-------------------------------------------------------------------------------|
|                            | pH 2.5          | pH 6.0 | pH 9.0 |                                                                               |
| 507                        | 507             | 504    | 504    | Isoindole deformation <sup>1,2</sup>                                          |
| 600                        | 604             | 602    | 603    | Macrocycle vibration <sup>1,2</sup> , macrocycle breathing <sup>3</sup>       |
| 683                        | 689             | 689    | 690    | Macrocycle vibration <sup>1,2</sup> , Pc breathing <sup>4</sup>               |
| 749                        | 751             | 752    | 752    | Macrocycle vibration <sup>1-3</sup> , C-H out-of-plane bending <sup>4,5</sup> |
| 1327                       | 1337            | 1339   | 1338   | Pyrrole stretching <sup>1-4</sup>                                             |
| 1522                       | 1533            | 1533   | 1533   | C=C, C=N pyrrole stretching <sup>1-4</sup>                                    |

### Molecular Organization: of PAH/FeTsPc LbL film at pH 2.5.

The molecular Organization of PAH/FeTsPc LbL film (at pH 2.5) was also evaluated by FTIR measurements (Figure S1), considering the surface selection rules<sup>6,7</sup>. The surface selection rules for FTIR measurements are based on the scalar product of dipole moment ( $\mu$ ) and the electric field of the beam ( $E$ ), following  $I = \mu \cdot E \cos \theta$ . Thus, the maximum band intensity is observed for  $\mu$  parallel to the  $E$ . Here, differences in the relative intensity of key bands from Pc indicate anisotropy of the casting film and preferential molecular orientation in the LbL films. For instance, the phthalocyanine bands assigned to in-plane C-H bending (1109 cm<sup>-1</sup>), Pc ring breathing (759 cm<sup>-1</sup>) (also in the plane of the FeTsPc macrocycle), and out-of-plane C-H wagging (700 cm<sup>-1</sup>) are evident in the FTIR spectra at transmission mode. However, the C-H out-of-plane band almost vanishes in reflection

mode, and the Pc ring breathing at  $759\text{ cm}^{-1}$  predominates. Thus, the FTIR measurements suggest the FeTsPc molecules must be with the macrocycle, preferably oriented at an angle of  $45\text{-}90^\circ$  at the substrate surface. In our case, the FTIR results agree with Raman analysis, revealing a tendency of the Pc macrocycle to tilt toward the substrate surface. The FTIR spectra also showed a shift in the band ascribed to  $\text{SO}_3^-$  stretching ( $1192$  to  $1181\text{ cm}^{-1}$ ) when comparing FeTsPc casting and PAH/FeTsPc LbL film (Figure 6), which gives evidence of the formation of “saline bridges” – interaction between  $\text{NH}_3^+$  of PAH and  $\text{SO}_3^-$  of FeTsPc <sup>8</sup>.

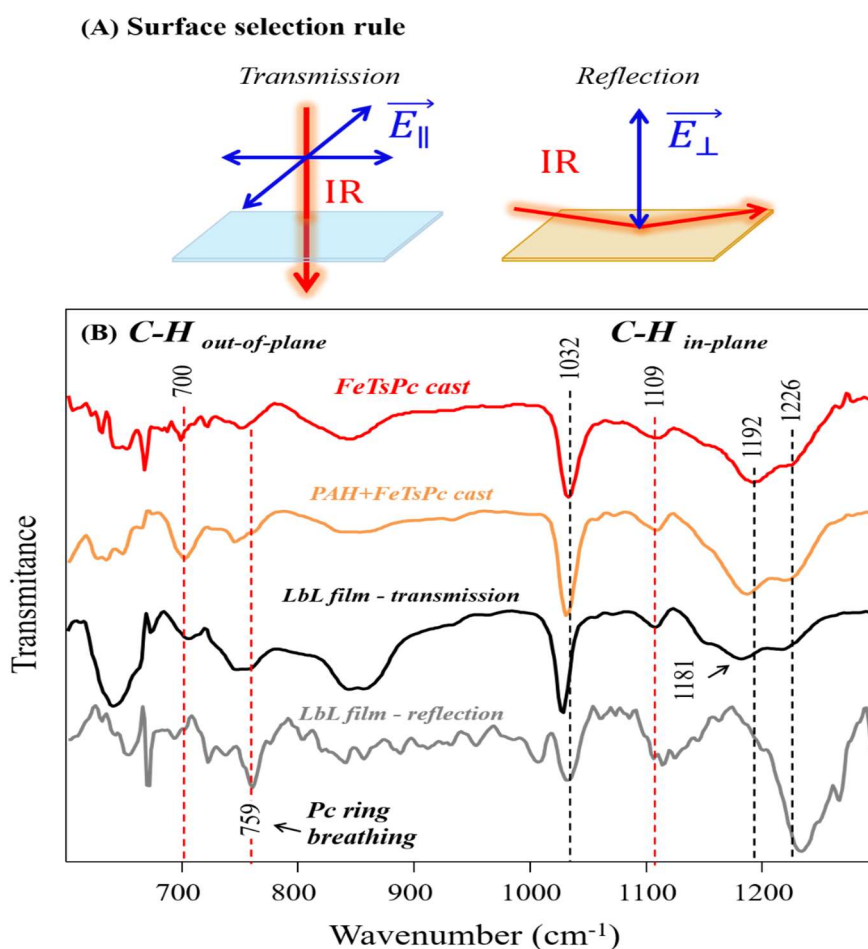

**Figure S1.** (A) Schematic representation of surface selection rule for transmission and reflection infrared spectroscopy, following  $I = \mu \cdot E \cos \theta$ . (B) FTIR spectra for FeTsPc casting (red), PAH+FeTsPc casting (orange), and PAH/FeTsPc LbL film (at pH 2.5) (black and gray). The transmission mode was performed to the film onto the Ge substrate and the reflection mode onto the Au substrate. PAH/FeTsPc LbL film has 30 bilayers for transmission mode and 60 for reflection mode measurements. All the spectra are plotted with normalized intensity.

### Surface coverage (Laviron equation)<sup>9</sup>

$$\Gamma = Q/nFA$$

The charge  $Q$  (C) was calculated by the integration of the anodic peak obtained from the cyclic voltammogram in HCl using a scan rate of 50 mV/s;  $n$  is the number of electrons transferred (assumed to be 1);  $F$  the Faraday constant (96485 C/mol), and  $A$  the geometry area of the working electrode (1 cm<sup>2</sup>).

### Thickness (from Faraday equation)

$$h = wQ/nFA\rho = w\Gamma/\rho$$

The  $\Gamma$  (surface coverage) was obtained using the relation of  $\Gamma = Q/nFA$  as described above,  $w$  is the sum of molecular weight of monomers (FeTsPc (942.60 g/mol) and PAH (56 x 10<sup>3</sup> g/mol)), and  $\rho$  the film density normalized to be 1 (g/cm<sup>3</sup>).

### AFM images

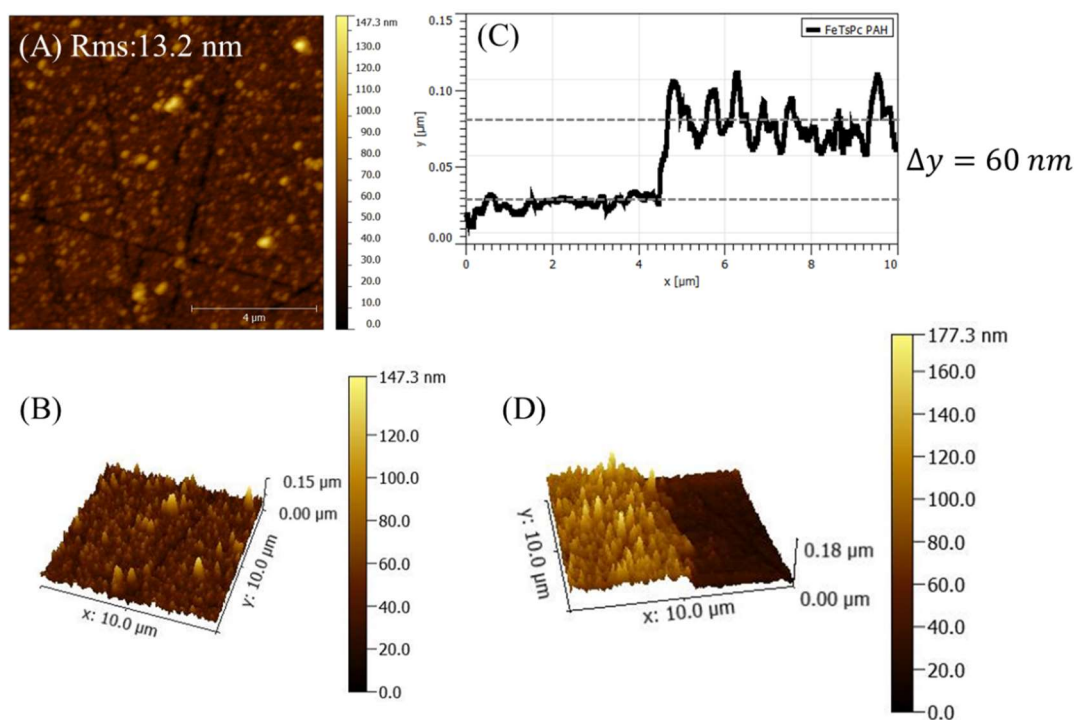

**Figure S2.** AFM images of topography (A, B) and thickness (C, D) of PAH/FeTsPc(2.5) film. The AFM images were collected using a Nanosurf microscope model Easyscan2 in tapping mode with a resolution of 512 dots/line and an area of 10x10 μm. The images were processed using the Gwyddion 2.9 software.

### ITO bare electrode in the presence of catechol

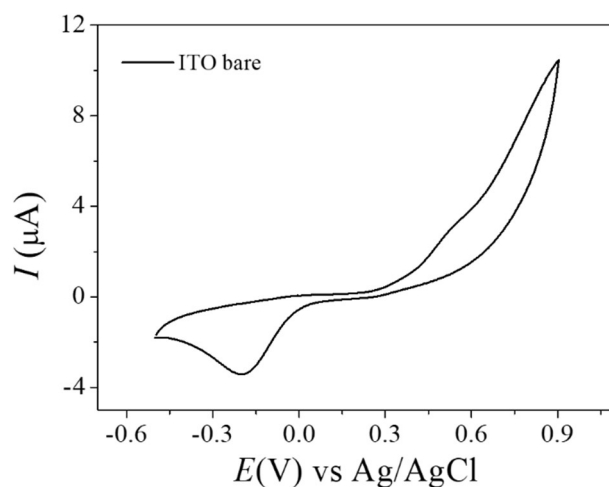

**Figure S3.** Cyclic voltammograms ITO bare electrode recorded in the presence of  $1.0 \times 10^{-4}$  mol/L of catechol at 50 mV/s using the 1 mmol/L HCl as supporting electrolyte.

### Scan rate effect – modified electrodes

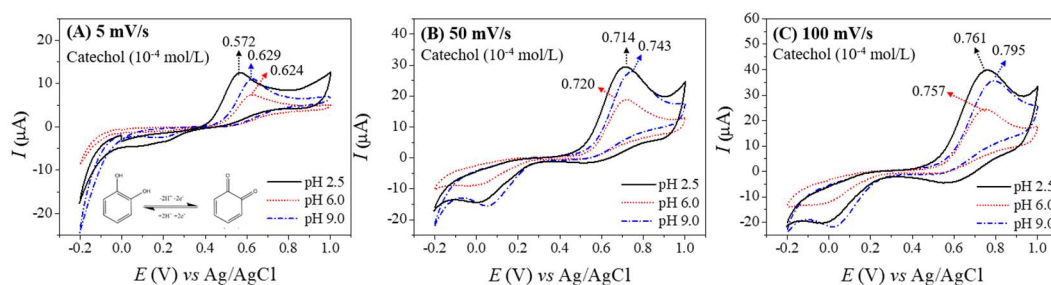

**Figure S4.** Cyclic voltammograms PAH/FeTsPc(2.5), PAH/FeTsPc(6.0), and PAH/FeTsPc(9.0) onto ITO recorded in the presence of  $1.0 \times 10^{-4}$  mol/L of catechol at 50 mV/s using 1 mmol/L HCl as supporting electrolyte.

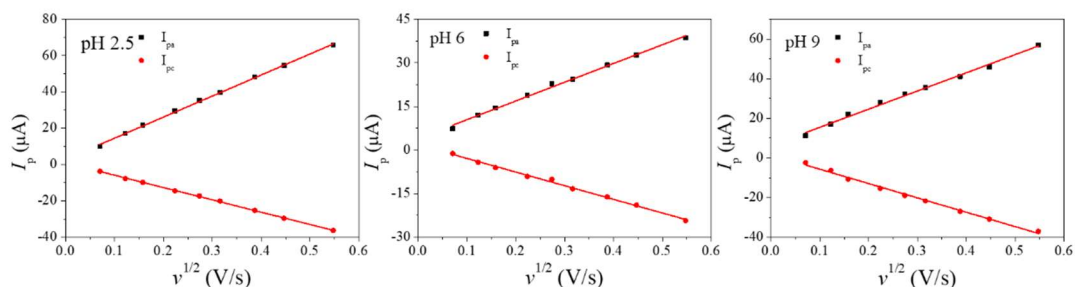

**Figure S5.** Peak current in the function of the square root of scan rate.

## References

1. Maximino MDMD, Martin CSCS, Paulovich FV, Alessio P. Layer-by-Layer Thin Film of Iron Phthalocyanine as a Simple and Fast Sensor for Polyphenol Determination in Tea Samples. *Journal of Food Science*. 2016;81(10):C2344-C2351. doi:10.1111/1750-3841.13394
2. Zucolotto V, Ferreira M, Cordeiro Marcia R., et al. Unusual interactions binding iron tetrasulfonated phthalocyanine and poly(allylamine hydrochloride) in layer-by-layer films. *Journal of Physical Chemistry B*. 2003;107(16):3733-3737. doi:10.1021/jp027573d
3. Aroca R, Martin F. Trace analysis of tetrasulphonated copper phthalocyanine by surface enhanced Raman spectroscopy. *Journal of Raman Spectroscopy*. 1986;17(3):243-247. doi:10.1002/jrs.1250170303
4. Furini LN, Martin CS, Camacho SA, et al. Electrochemical properties of nickel phthalocyanine: The effect of thin film morphology tuned by deposition techniques. *Thin Solid Films*. 2020;699(February):137897. doi:10.1016/j.tsf.2020.137897
5. de Lucena NC, Miyazaki CM, Shimizu FM, Constantino CJL, Ferreira M. Layer-by-layer composite film of nickel phthalocyanine and montmorillonite clay for synergistic effect on electrochemical detection of dopamine. *Applied Surface Science*. 2018;436:957-966. doi:10.1016/j.apsusc.2017.12.117
6. Debe MK. Optical probes of organic thin films: Photons-in and photons-out. *Progress in Surface Science*. 1987;24(1-4):1-282. doi:10.1016/0079-6816(87)90065-7
7. Born M, Wolf E. *Principles of Optics: Electromagnetic Theory of Propagation, Interference and Diffraction of Light*. 5th ed. Pergamon Press; 1975.
8. Zucolotto V, Ferreira M, Cordeiro Marcia R., et al. Unusual interactions binding iron tetrasulfonated phthalocyanine and poly(allylamine hydrochloride) in layer-by-layer films. *Journal of Physical Chemistry B*. 2003;107(16):3733-3737. doi:10.1021/jp027573d
9. Laviron E. General expression of the linear potential sweep voltammogram in the case of diffusionless electrochemical systems. *Journal of Electroanalytical Chemistry and Interfacial Electrochemistry*. 1979;101(1):19-28. doi:10.1016/S0022-0728(79)80075-3
